# Supplementary material for: Electronic excitation induced hydrogen-bond adjustment and lattice control in organic–inorganic hybrid cubic perovskites: a fixed occupation molecular dynamics study
Source: Royal Society of Chemistry journal article supplement (doi:10.1039/c7cp05034h), 2017-01-01
Supplement: c7cp05034h2.pdf [file c7cp05034h2.pdf]

V1. MD evolution video of lattice of MAPbI<sub>3</sub> in the ground state and the 2.88% excitation state.  
Green balls are showed for the ideal inorganic lattice for reference.
